# Supplementary material
Source: Royal Society of Chemistry journal article supplement (doi:10.1039/d6ce00358c)
Supplement: d6ce00358c1.pdf [file d6ce00358c1.pdf]

**Supplementary Information for “Experimental evidence of Kondo  
effect induced by oxygen-vacancy in IrO<sub>2</sub> crystals”**

Lin Cao<sup>1,2,3</sup>, Hao-Min Lu<sup>1,3</sup>, Qi-Xun Wen<sup>1,4</sup>, Pei-Qun Ma<sup>1,3</sup>, Xu Zhang<sup>6</sup>, Jing-Ru  
Chang<sup>1,3</sup>, Cheng-Hao Yin<sup>1,4</sup>, Ye-Cheng Luo<sup>1,4</sup>, Yang-Yang Lv<sup>1,3,†</sup>, Ranran Zhang<sup>5</sup>, S.  
-H. Yao<sup>1,3</sup>, Jian Zhou<sup>1,3</sup>, Shi Yan Li<sup>6</sup>, and Y. B. Chen<sup>1,4,‡</sup>

<sup>1</sup> National Laboratory of Solid State Microstructures, Nanjing University, Nanjing  
210093, China

<sup>2</sup> Nanjing University of Posts and Telecommunications College of Science, Nanjing  
210023, China

<sup>3</sup> Department of Materials Science and Engineering, Nanjing University, Nanjing  
210093, China

<sup>4</sup> Department of Physics, Nanjing University, Nanjing 210093, China

<sup>5</sup> High Magnetic Field Laboratory, Chinese Academy of Sciences and University of  
Science and Technology of China, Hefei 230031, China

<sup>6</sup>State Key Laboratory of Surface Physics, and Department of Physics, Fudan  
University, Shanghai 200438, China

Email addresses:

[†lvyangws0801@nju.edu.cn](mailto:†lvyangws0801@nju.edu.cn); [‡ybchen@nju.edu.cn](mailto:‡ybchen@nju.edu.cn)

**Section 1: Comparison of the low-temperature resistivity fitting of the IrO<sub>2</sub> crystal using  $\ln T$  and  $\sqrt{T}$  forms.**

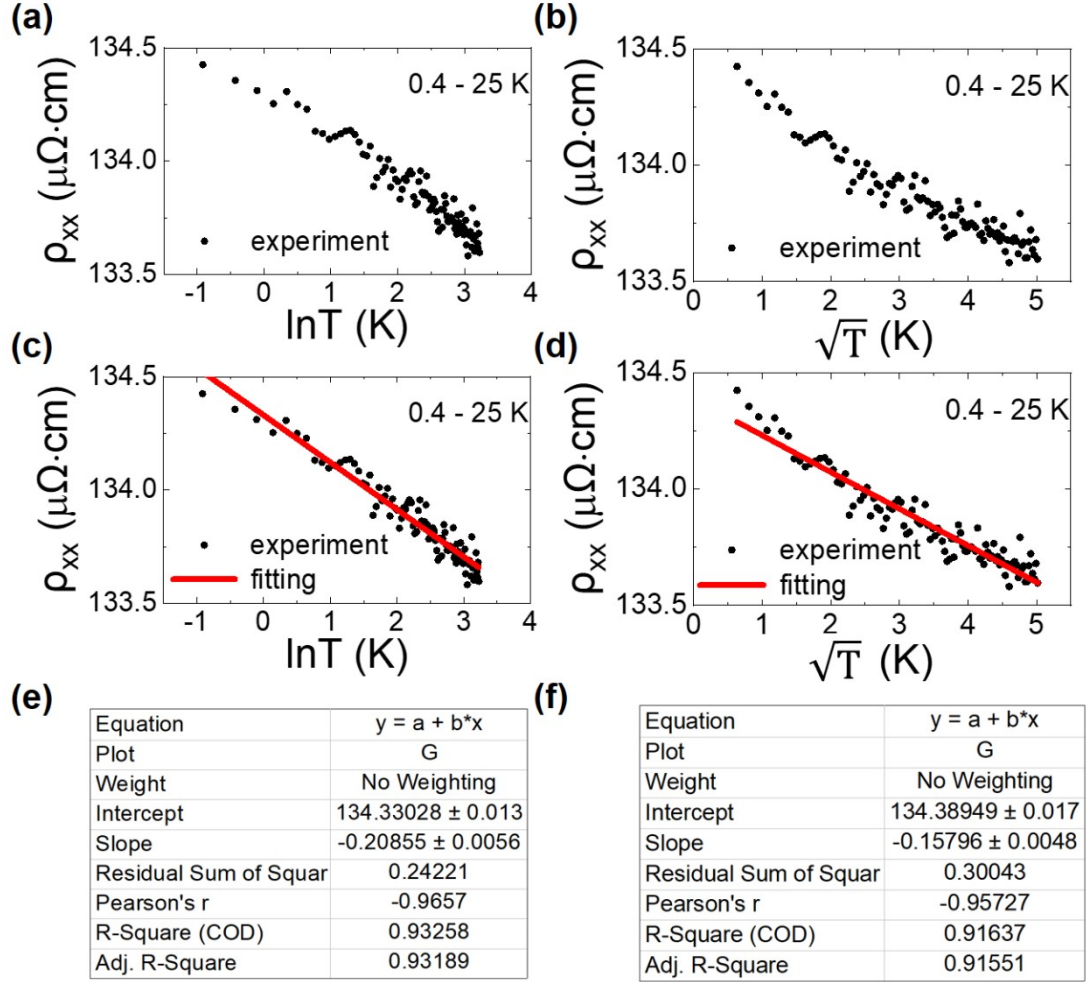

**Fig. S1.** Comparison of the low-temperature resistivity fitting of the IrO<sub>2</sub> crystal using

$\ln T$  and  $\sqrt{T}$  forms in the temperature range of 0.4-25 K. (a) and (b) show the experimental  $\rho_{xx}$  data by linear functions against  $\ln T$  and  $\sqrt{T}$ , respectively. (c) and (d) show the fitted  $\rho_{xx}$  data by linear functions against  $\ln T$  and  $\sqrt{T}$ , respectively. while (e) and (f) summarize the corresponding fitting parameters and goodness-of-fit statistics.

The  $\ln T$  fitting gives a higher R<sup>2</sup> value than the  $\sqrt{T}$  fitting.

## Section 2: Rule out the 3D weak localization.

In 3D weak localization scenario, resistivity change due to 3D weak localization is proportional to  $-T^{\alpha/2}$ ,  $\alpha$  is dependent on the scattering mechanism. For example,  $\alpha$  is 3.0 for electron-phonon scattering, while  $\alpha$  is 2.0 for electron-electron scattering (see chapter 9, E. N. Economou, *Green's Functions in Quantum Physics*, Springer, 2006, 3th edition). Using this criterion, we fitted the temperature-dependent resistivity. The fitting results are shown in Fig. S2, one can see that the fitting quality is significantly worse. Based on these new data, we think that the 3D weak localization still can be ruled out.

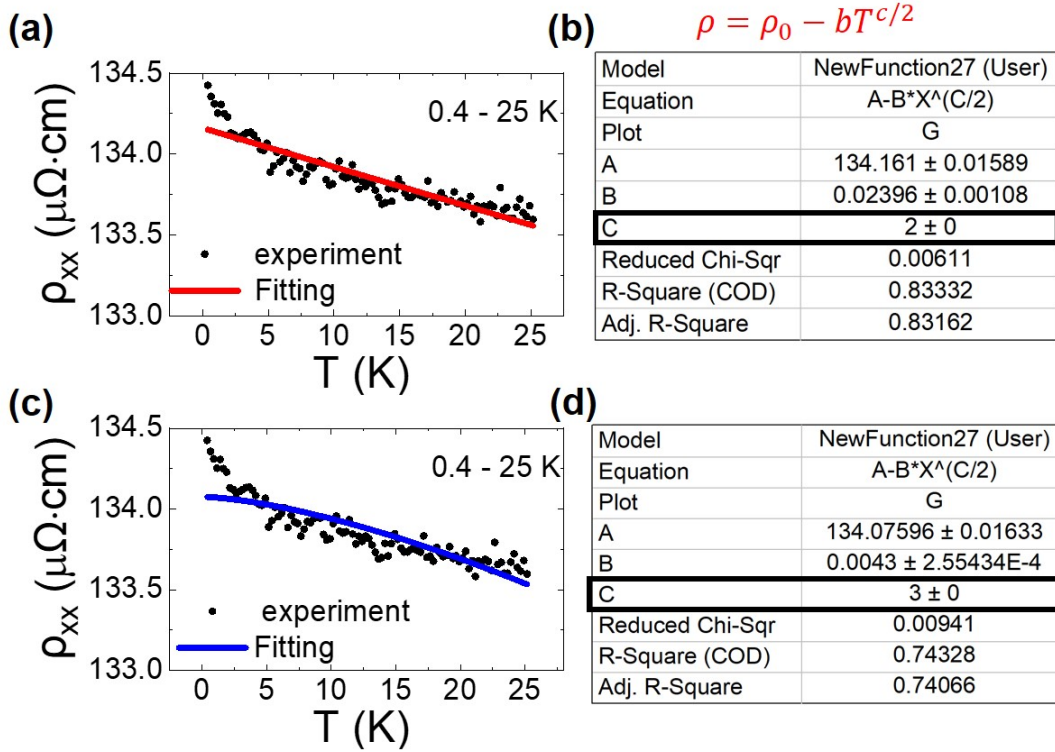

**Fig. S2.** Comparison of the low-temperature resistivity fitting of the  $\text{IrO}_2$  crystal using  $-T^{\alpha/2}$  forms in the temperature range of 0.4-25 K.  $\alpha$  is dependent on the scattering mechanism. For example,  $\alpha$  is 3.0 for electron-phonon scattering, while  $\alpha$  is 2.0 for electron-electron scattering. one can see that the fitting quality is significantly worse.

### **Section 3: Fitted the M-B curves by Brillouin- and Langevin functions.**

We tested both Langevin and Brillouin functions for the nonlinear part of the  $M(B)$  response. It is noted that the difference between the fits is not very pronounced in the main  $M(B)$  plot because both functions reproduce the overall nonlinear trend rather well (see Figs. S3(a) and (c)). Therefore, our comparison is based mainly on the residuals (see Figs. S3(b) and (d)). For the nonlinear component, the best Brillouin fit gives a smaller root-mean-square error (RMSE) than the Langevin fit, indicating a somewhat better phenomenological description. But in the point of physical view, the fitted results are not reasonable. Because, as shown in the labels in Fig. S3(c), when  $J$  is larger than 1.0, the g-factor is smaller than 2. Generally, the magnetic moments in the systems comes from spins, rather than orbitals, because orbital moments are canceled by crystalline fields (see S. Blundell, *Magnetism in Condensed Matter*, Oxford University Press, 2001). g-factor of spin is exactly 2, that cannot smaller than 2. Based on this stringent constraint, we believe that the fitted results shown in Fig. S3(c) are not reasonable in physics.

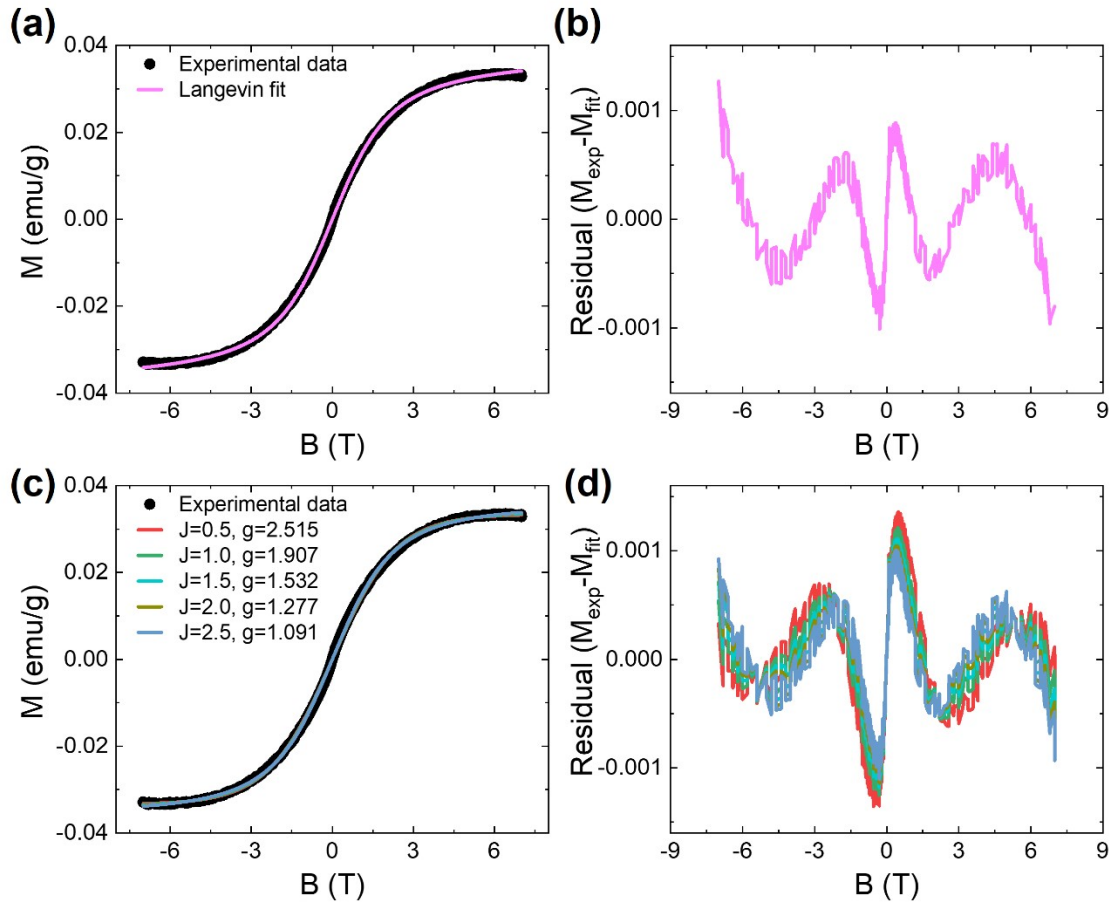

**Fig. S3.** Comparison between Langevin and Brillouin fits for the nonlinear component extracted from the 2 K  $M(B)$  curve of  $\text{IrO}_2$ . (a) Experimental nonlinear component fitted by the Langevin function (pink line). (b) Residual plot for the fit, shown as  $M_{\text{exp}} - M_{\text{fit}}$  as a function of magnetic field. (c) Experimental nonlinear component fitted by Brillouin functions with different discrete  $J$  values (0.5, 1.0, 1.5, 2.0, 2.5). (d) Corresponding residuals for the Brillouin fits with different  $J$  values. Although the difference among the fitting curves is not very pronounced in the main  $M(B)$  plots, the residual analysis shows that the Brillouin description gives a somewhat better phenomenological fit to the nonlinear component than the Langevin form.
